# Supplementary material for: Comprehensive analysis identifies DNA damage repair-related gene HCLS1 associated with good prognosis in lung adenocarcinoma
Source: PubMed Central journal article supplement — Transl Cancer Res. 2023 Oct 24;12(10):2613–28. doi: 10.21037/tcr-23-921 (PMC10643974; doi:10.21037/tcr-23-921), 2023-10-24
Supplement: tcr-12-10-2613-supplementary.pdf [file tcr-12-10-2613-supplementary.pdf]

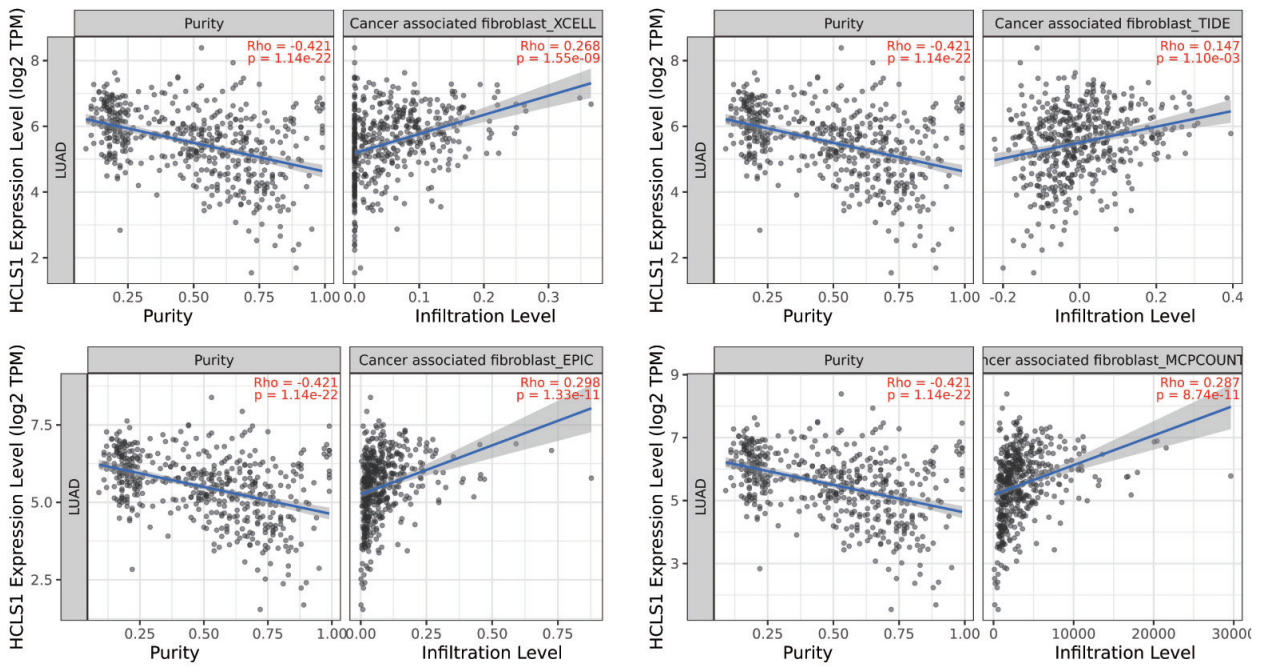

Figure S1 Correlation between HCLS1 expression and cancer-associated fibroblast immune infiltration.
